# Supplementary material for: H2 Enhances Arabidopsis Salt Tolerance by Manipulating ZAT10/12-Mediated Antioxidant Defence and Controlling Sodium Exclusion
Source: PLOS journal article supplement (doi:10.1371/journal.pone.0049800), 2012-11-21
Supplement: S2 (10.1371/journal.pone.0049800.s002) [file journal.pone.0049800.s002]

6 **Figure S2**

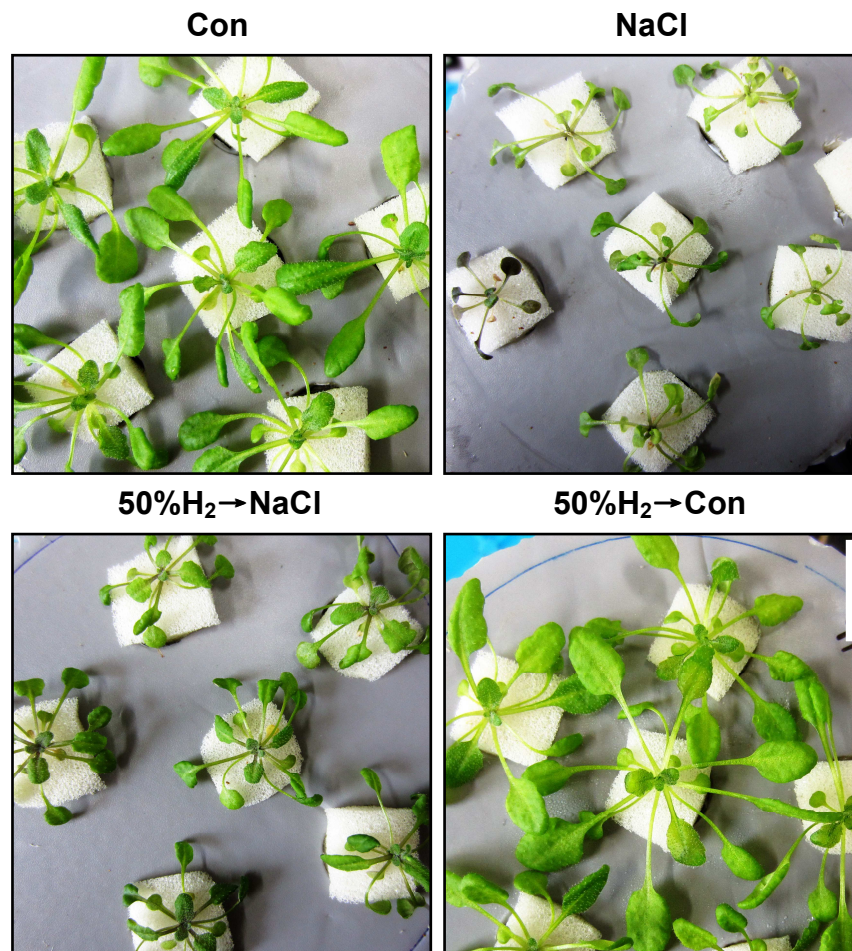

7

8 **Figure S2.** Morphology of Arabidopsis seedlings growth on media containing H<sub>2</sub> and  
9 NaCl. 25-day-old seedlings were pre-incubated in 50% H<sub>2</sub>-saturated MS liquid  
10 medium for 24 hr, and then exposed to the MS liquid medium in the presence or  
11 absence of 150 mM NaCl for another 8 days. Sample without chemicals was the  
12 control (Con). Bar = 2 cm.
